# Supplementary material for: A simple synthesis of Ga2O3 and GaN nanocrystals
Source: Royal Society of Chemistry journal article supplement (doi:10.1039/c7ra10639d), 2017-01-01
Supplement: c7ra10639d1.pdf [file c7ra10639d1.pdf]

## Supporting Information

### A Simple Synthesis of Ga<sub>2</sub>O<sub>3</sub> and GaN Nanocrystals

Erwei Hang<sup>a</sup>, Juxia Li<sup>a</sup>, Guangjun Wu<sup>a</sup>, Weili Dai<sup>a</sup>, Naijia Guan<sup>a,b</sup>, Landong Li<sup>a,b\*</sup>

<sup>a</sup> School of Materials Science and Engineering & National Institute for Advanced Materials, Nankai University, Tianjin, 300350, P.R. China

<sup>b</sup> Key Laboratory of Advanced Energy Materials Chemistry (Ministry of Education), Collaborative Innovation Center of Chemical Science and Engineering, Tianjin, 300071, P.R. China

\* Corresponding E-mail: [lild@nankai.edu.cn](mailto:lild@nankai.edu.cn)

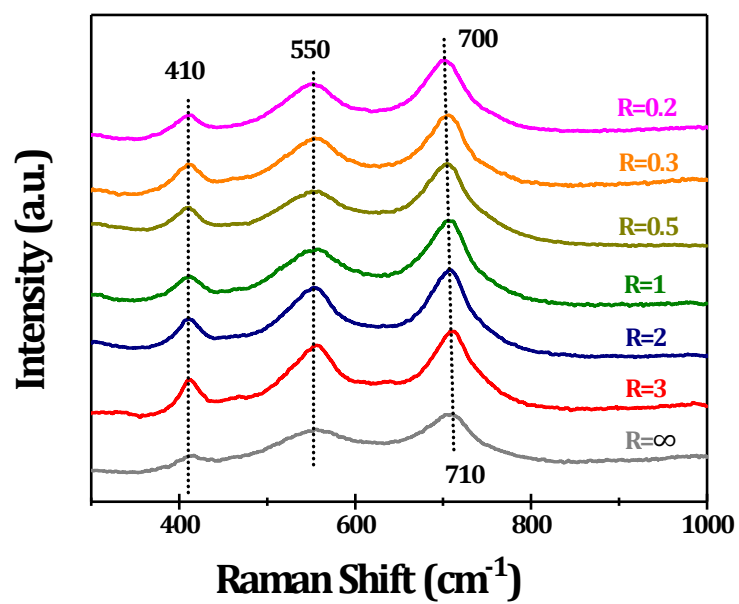

Figure S1 Raman spectra of Ga<sub>2</sub>O<sub>3</sub> synthesized at different R values

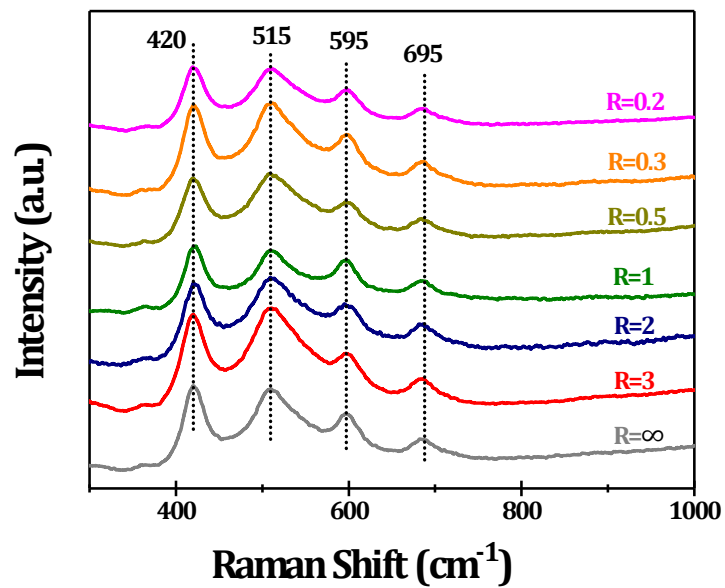

Figure S2 Raman spectra of GaN from nitridation of Ga<sub>2</sub>O<sub>3</sub> synthesized at different R values

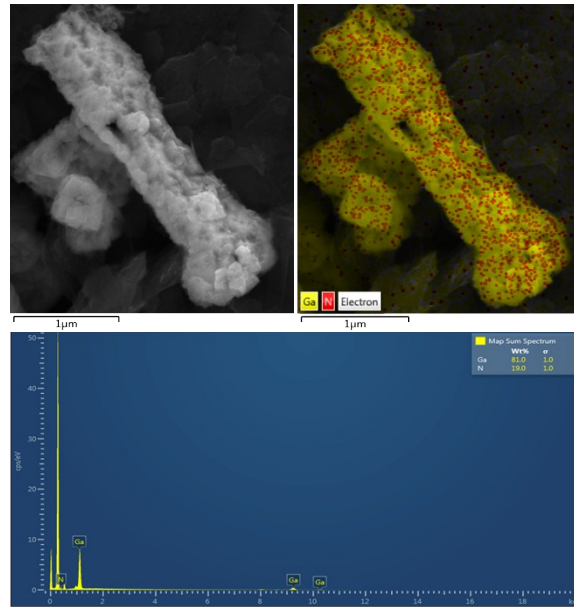

**Figure S3** Energy-dispersive X-ray mapping analysis on representative GaN sample (R=1)

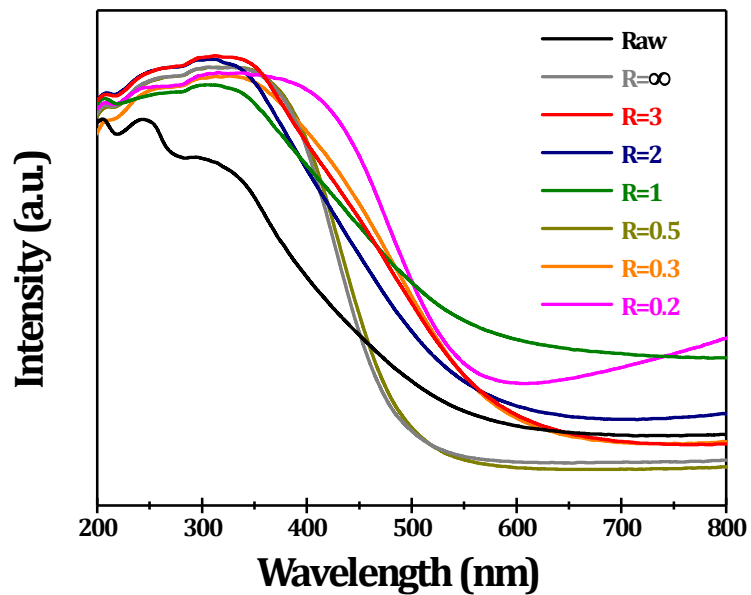

**Figure S4** UV-vis spectra of GaN from nitridation of  $\text{Ga}_2\text{O}_3$  synthesized at different R values

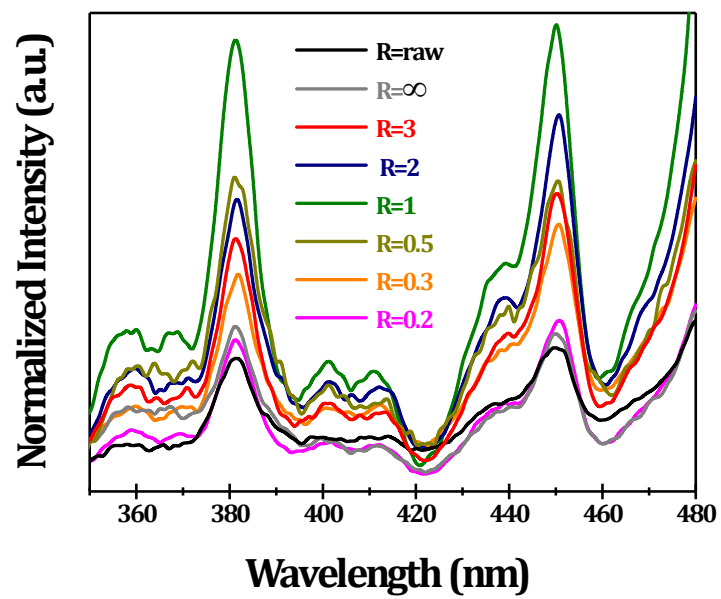

**Figure S5** Photoluminescence spectra of GaN from nitridation of  $\text{Ga}_2\text{O}_3$  synthesized at different R values
